# Supplementary material for: Vasohibins: new transglutaminase-like cysteine proteases possessing a non-canonical Cys-His-Ser catalytic triad
Source: PubMed Central journal article supplement (PMC4866520; doi:10.1093/bioinformatics/btv761), 2016-01-21
Supplement: supp_btv761_SanchezVASHSupplementary.pdf [file supp_btv761_SanchezVASHSupplementary.pdf]

VASH1\_HUMAN  
VASH2\_HUMAN  
SeaUrchin  
Branchiostoma  
F32RM9\_LOTGI  
Oyster  
estAlvinella  
Capitella  
modA7S7p4\_NEMVE  
B3RK8\_TR1AD  
H2YL2\_CIOSA  
T2BI22\_HELRO  
T11QU1\_STRMM  
F2UH18\_SALRS  
estOpi.sthorchis  
A9JJD6\_SCHWA  
U6HD26\_ECHMU  
T2MBD5\_HYDVU  
modA9VAY5\_MONBE  
E4X003\_OIKDI  
FOWGX1\_9STRA  
Phytophthora  
K3X8V2\_PYTUL  
Q484V0\_TRYCR  
Q387E4\_9TRVP  
Q4FY56\_LEIMA  
ClMY9\_MICPC  
Volvox  
Aureococcus  
Physcomitrella1  
Selaginella1  
Selaginella2  
D2YBG6\_NAEGR

122 LEAVRIRLEOAHHTGTOFFEIKKSRPLTGLMDLAKEMTKAEPKLEAVIIGIYITNSMPTLERFFISRTY FSGNYFRFVILGVNF...AGRYCALGSRREDMYKPPAPRTLISEVLDLEAA 247  
111 LQAIOMKLOAHHTGTOFFEIKKSRPLTGLMDLAKEMTKAEPKLEAVIIGIYITNSMPTLERFFISRTY FSGNYFRFVILGVNF...NGRYCALGSRREDMYKPPAPRTLISEVLDLEAA 236  
54 LEAIDOMKLOAHHTGTOFFEIKKSRPLTGLMDLAKEMTKAEPKLEAVIIGIYITNSMPTLERFFISRTY FSGNYFRFVILGVNF...NGRYCALGSRREDMYKPPAPRTLISEVLDLEAA 179  
97 LWLVKYMSDLOAHHTGTOFFEIKKSRPLTGLMDLAKEMTKAEPKLEAVIIGIYITNSMPTLERFFISRTY FSGNYFRFVILGVNF...GGRYCALGSRREDMYKPPAPRTLISEVLDLEAA 222  
98 LKRIOMYRDLLOAHHTGTOFFEIKKSRPLTGLMDLAKEMTKAEPKLEAVIIGIYITNSMPTLERFFISRTY FSGNYFRFVILGVNF...GGRYCALGSRREDMYKPPAPRTLISEVLDLEAA 223  
119 LKRIOMYRDLLOAHHTGTOFFEIKKSRPLTGLMDLAKEMTKAEPKLEAVIIGIYITNSMPTLERFFISRTY FSGNYFRFVILGVNF...GGRYCALGSRREDMYKPPAPRTLISEVLDLEAA 224  
94 LEIWKYMSLOAHHTGTOFFEIKKSRPLTGLMDLAKEMTKAEPKLEAVIIGIYITNSMPTLERFFISRTY FSGNYFRFVILGVNF...GGRYCALGSRREDMYKPPAPRTLISEVLDLEAA 219  
85 LSVIKYMSLOAHHTGTOFFEIKKSRPLTGLMDLAKEMTKAEPKLEAVIIGIYITNSMPTLERFFISRTY FSGNYFRFVILGVNF...GGRYCALGSRREDMYKPPAPRTLISEVLDLEAA 210  
92 LVIKYLQOLOAHHTGTOFFEIKKSRPLTGLMDLAKEMTKAEPKLEAVIIGIYITNSMPTLERFFISRTY FSGNYFRFVILGVNF...GGRYCALGSRREDMYKPPAPRTLISEVLDLEAA 217  
73 IICIONYISLLOAHHTGTOFFEIKKSRPLTGLMDLAKEMTKAEPKLEAVIIGIYITNSMPTLERFFISRTY FSGNYFRFVILGVNF...GGRYCALGSRREDMYKPPAPRTLISEVLDLEAA 198  
84 LKQIONYISLLOAHHTGTOFFEIKKSRPLTGLMDLAKEMTKAEPKLEAVIIGIYITNSMPTLERFFISRTY FSGNYFRFVILGVNF...GGRYCALGSRREDMYKPPAPRTLISEVLDLEAA 209  
74 LEMVKYLESLOAHHTGTOFFEIKKSRPLTGLMDLAKEMTKAEPKLEAVIIGIYITNSMPTLERFFISRTY FSGNYFRFVILGVNF...GGRYCALGSRREDMYKPPAPRTLISEVLDLEAA 199  
104 TIADVMEKLOAHHTGTOFFEIKKSRPLTGLMDLAKEMTKAEPKLEAVIIGIYITNSMPTLERFFISRTY FSGNYFRFVILGVNF...GGRYCALGSRREDMYKPPAPRTLISEVLDLEAA 229  
151 LKTRFLWRLLOAHHTGTOFFEIKKSRPLTGLMDLAKEMTKAEPKLEAVIIGIYITNSMPTLERFFISRTY FSGNYFRFVILGVNF...GGRYCALGSRREDMYKPPAPRTLISEVLDLEAA 229  
104 LELIONYINFTLOAHHTGTOFFEIKKSRPLTGLMDLAKEMTKAEPKLEAVIIGIYITNSMPTLERFFISRTY FSGNYFRFVILGVNF...GGRYCALGSRREDMYKPPAPRTLISEVLDLEAA 229  
71 LANKVYLNSEVLOAHHTGTOFFEIKKSRPLTGLMDLAKEMTKAEPKLEAVIIGIYITNSMPTLERFFISRTY FSGNYFRFVILGVNF...GGRYCALGSRREDMYKPPAPRTLISEVLDLEAA 197  
76 LDAIOYLSLEVLOAHHTGTOFFEIKKSRPLTGLMDLAKEMTKAEPKLEAVIIGIYITNSMPTLERFFISRTY FSGNYFRFVILGVNF...GGRYCALGSRREDMYKPPAPRTLISEVLDLEAA 201  
93 VKLVNFOLOAHHTGTOFFEIKKSRPLTGLMDLAKEMTKAEPKLEAVIIGIYITNSMPTLERFFISRTY FSGNYFRFVILGVNF...GGRYCALGSRREDMYKPPAPRTLISEVLDLEAA 220  
113 GQDVPVVRLOAHHTGTOFFEIKKSRPLTGLMDLAKEMTKAEPKLEAVIIGIYITNSMPTLERFFISRTY FSGNYFRFVILGVNF...GGRYCALGSRREDMYKPPAPRTLISEVLDLEAA 239  
103 LCNKIGFNQLEOHHTGTOFFEIKKSRPLTGLMDLAKEMTKAEPKLEAVIIGIYITNSMPTLERFFISRTY FSGNYFRFVILGVNF...GGRYCALGSRREDMYKPPAPRTLISEVLDLEAA 228  
44 LHPTIOYLNALLOAHHTGTOFFEIKKSRPLTGLMDLAKEMTKAEPKLEAVIIGIYITNSMPTLERFFISRTY FSGNYFRFVILGVNF...GGRYCALGSRREDMYKPPAPRTLISEVLDLEAA 174  
206 LHAIONYLNALLOAHHTGTOFFEIKKSRPLTGLMDLAKEMTKAEPKLEAVIIGIYITNSMPTLERFFISRTY FSGNYFRFVILGVNF...GGRYCALGSRREDMYKPPAPRTLISEVLDLEAA 332  
47 LGICVHINTLEVLOAHHTGTOFFEIKKSRPLTGLMDLAKEMTKAEPKLEAVIIGIYITNSMPTLERFFISRTY FSGNYFRFVILGVNF...GGRYCALGSRREDMYKPPAPRTLISEVLDLEAA 172  
45 IPVONVNLNLOAHHTGTOFFEIKKSRPLTGLMDLAKEMTKAEPKLEAVIIGIYITNSMPTLERFFISRTY FSGNYFRFVILGVNF...GGRYCALGSRREDMYKPPAPRTLISEVLDLEAA 172  
47 IPVONVNLNLOAHHTGTOFFEIKKSRPLTGLMDLAKEMTKAEPKLEAVIIGIYITNSMPTLERFFISRTY FSGNYFRFVILGVNF...GGRYCALGSRREDMYKPPAPRTLISEVLDLEAA 172  
45 VPFIQOISLLOAHHTGTOFFEIKKSRPLTGLMDLAKEMTKAEPKLEAVIIGIYITNSMPTLERFFISRTY FSGNYFRFVILGVNF...GGRYCALGSRREDMYKPPAPRTLISEVLDLEAA 172  
156 LRAAOCIDSLLOAHHTGTOFFEIKKSRPLTGLMDLAKEMTKAEPKLEAVIIGIYITNSMPTLERFFISRTY FSGNYFRFVILGVNF...GGRYCALGSRREDMYKPPAPRTLISEVLDLEAA 173  
48 LNVVOVINSLOAHHTGTOFFEIKKSRPLTGLMDLAKEMTKAEPKLEAVIIGIYITNSMPTLERFFISRTY FSGNYFRFVILGVNF...GGRYCALGSRREDMYKPPAPRTLISEVLDLEAA 283  
132 LHAITRIIAFENLOAHHTGTOFFEIKKSRPLTGLMDLAKEMTKAEPKLEAVIIGIYITNSMPTLERFFISRTY FSGNYFRFVILGVNF...GGRYCALGSRREDMYKPPAPRTLISEVLDLEAA 175  
49 LRAVQYLDGFENRPNMPSKQVKKLRLPSGLMATAKLIHQPEPIKCEAVFLALYTAGMDVDRAPIGKTE CGGREHREIIVLVHRE...TGACCAALGSRREDMYKPPAPRTLISEVLDLEAA 174  
39 LKAIORVINSFENKOTPTTSFNHFRPLSRMDTAKMMLYPOKIKCEAVFLALYTAGMDVDRAPIGKTE EDDKVOHIVLVRYG...DKYCAFGLSRREDMYKPPAPRTLISEVLDLEAA 164  
37 LKAVQYIGCFERIALQPHNVNRYRPLAKLMDTQOMLHSPQAIKCEAVFLALYTAGMDVDRAPIGKTE QDTKIHOIIVLVRYG...KKFCAFGLSRREDMYKPPAPRTLISEVLDLEAA 162  
896 LKIKIONFISAFENYIEQHFFEDITRLPLKSIIOITAKEVVDVSDCIPIKCEAVFLALYTAGMDVDRAPIGKTE MTQRVYREIIVLVRYG...GRFCALGSRREDMYKPPAPRTLISEVLDLEAA 1021

117 PEKVQYLDLSPNHE...VDKVYLSALECVRONHACHGALLGAYILSLH GFFAQLDLRAS...KWDDDEVVTFPQFN...GLWCCLISVNHSSREFNSVNSIREVMSFDDI 227  
23 PAKIOKFLDIPYKLS...YTARSPKVIORVAVSLEGGIFAAAALRII GPPPLIFDLAE...QDTEVIAIFKVR...GHWCAVAKSNFTGCRYPREPVYRTIREVMSFENI 129  
26 PIRIONFLDAMPLNE...KOGETMSPRRVRAKMHCFEGALAAAALWLR GPPPLIFDLRVK...GDDEVVALYKRH...GHWCAISLNHASRFRFDYKTIRESALSFEHY 135  
9 PIRIONVLDVPMWE...KHGETMSPRALREKMECEGALFAAVWQW GEPSSLFDLAD...GDDEVVALYKRH...GHWCAISLNHASRFRFDYKTIRESALSFEHY 118  
10 PARIORFLDAVPQOYA...PTAWSPRALREKKGCEGALAAAALRVN GHPLMDLEAV...RDDDELISLFTID...GHFCALISNFGAFRFRAPVYRTIRDALSFEHY 116  
27 PGIORFLDIPKSD...PIYRSPRVLROKACCEGALAAAALRLL GYTPRVEIKAV...RDDDELISLFTID...GHFCALISNFGAFRFRAPVYRTIRDALSFEHY 133  
39 PEKIDFIDKIGDE...DDYFVSRTIKTKAKMGALVAAACCLDRIGLGPRLVGDAK...NDDFAVAVYQD...GYWCAICENFTILRSRFFAVKSUREVMSFDFE 146  
19 PIKVOELIGLISFNQ...KRLSPVOLEQRADCEAAFAHAFQFH GIDSFIDLRAV...HDEDEITCAKYG...SHLCAVAKSFLHFRFRPVYKTRGRVMSFEHY 124  
19 PKIODYLNTKINFE...EKEDTFCSPRVLKQKCHIEGAVLAAALIRFH RHPKLVVDLTS...EKDFDVIKAYK...GHWCAISLNHPVRYRPREVNSIREVMSFEHY 129  
18 PKIODELNKIPNFE...PTEDTFLSPREVLLQNHACHGACLAAAALIRFH GHKPLVDLTS...KEDQEVIAVQFLH...GHWCAISLNHVARRYRPREVYKTIRESALSFEHY 128  
20 PEKIORFLDIPYKNE...RHGPTCLSPRVIREKTAHCEGAFAAALRM GHPLPLDLEAV...RDDDELISLFTID...GHFCALISNFGAFRFRAPVYRTIREVMSFEHY 129  
25 PQRVSEFLRAMEAAE...KGETLRSAAALQIKKAKHCEAAFAAALLEQ GYPPVLVMSLESI...DLDLIVIFVYQKDKGLKQGVARSRDEGHRKPKIRIRLALSFEHY 139

171 Q7  
H204  
E171  
C169  
S221  
Putative Ca<sup>2+</sup>-binding

117 PEKVQYLDLSPNHE...VDKVYLSALECVRONHACHGALLGAYILSLH GFFAQLDLRAS...KWDDDEVVTFPQFN...GLWCCLISVNHSSREFNSVNSIREVMSFDDI 227  
23 PAKIOKFLDIPYKLS...YTARSPKVIORVAVSLEGGIFAAAALRII GPPPLIFDLAE...QDTEVIAIFKVR...GHWCAVAKSNFTGCRYPREPVYRTIREVMSFENI 129  
26 PIRIONFLDAMPLNE...KOGETMSPRRVRAKMHCFEGALAAAALWLR GPPPLIFDLRVK...GDDEVVALYKRH...GHWCAISLNHASRFRFDYKTIRESALSFEHY 135  
9 PIRIONVLDVPMWE...KHGETMSPRALREKMECEGALFAAVWQW GEPSSLFDLAD...GDDEVVALYKRH...GHWCAISLNHASRFRFDYKTIRESALSFEHY 118  
10 PARIORFLDAVPQOYA...PTAWSPRALREKKGCEGALAAAALRVN GHPLMDLEAV...RDDDELISLFTID...GHFCALISNFGAFRFRAPVYRTIRDALSFEHY 116  
27 PGIORFLDIPKSD...PIYRSPRVLROKACCEGALAAAALRLL GYTPRVEIKAV...RDDDELISLFTID...GHFCALISNFGAFRFRAPVYRTIRDALSFEHY 133  
39 PEKIDFIDKIGDE...DDYFVSRTIKTKAKMGALVAAACCLDRIGLGPRLVGDAK...NDDFAVAVYQD...GYWCAICENFTILRSRFFAVKSUREVMSFDFE 146  
19 PIKVOELIGLISFNQ...KRLSPVOLEQRADCEAAFAHAFQFH GIDSFIDLRAV...HDEDEITCAKYG...SHLCAVAKSFLHFRFRPVYKTRGRVMSFEHY 124  
19 PKIODYLNTKINFE...EKEDTFCSPRVLKQKCHIEGAVLAAALIRFH RHPKLVVDLTS...EKDFDVIKAYK...GHWCAISLNHPVRYRPREVNSIREVMSFEHY 129  
18 PKIODELNKIPNFE...PTEDTFLSPREVLLQNHACHGACLAAAALIRFH GHKPLVDLTS...KEDQEVIAVQFLH...GHWCAISLNHVARRYRPREVYKTIRESALSFEHY 128  
20 PEKIORFLDIPYKNE...RHGPTCLSPRVIREKTAHCEGAFAAALRM GHPLPLDLEAV...RDDDELISLFTID...GHFCALISNFGAFRFRAPVYRTIREVMSFEHY 129  
25 PQRVSEFLRAMEAAE...KGETLRSAAALQIKKAKHCEAAFAAALLEQ GYPPVLVMSLESI...DLDLIVIFVYQKDKGLKQGVARSRDEGHRKPKIRIRLALSFEHY 139



## Supplemental Fig. S1.

### Representative multiple sequence alignment of the vasohibin and vasohibin-like families.

The alignment shown in Figure 1 corresponds to the currently defined core of the transglutaminase-like cysteine protease family (Ginalski *et al.*, 2004; Makarova *et al.*, 1999; Makarova *et al.*, 2000; Chatterjee *et al.* 2012), but we were able to extend the alignment between vasohibin and vasohibin-like families further toward their C-termini, including a predicted alpha-helix. Putative catalytic residues are shown in red. A putative calcium-binding residue E171 in human VASH1 is labelled. Families are indicated by coloured bars to the left of the alignment: vasohibin and vasohibin-like sequences are indicated in red and yellow, respectively. Secondary structure predictions (Jones, 1999) were performed independently for the vasohibin and vasohibin-like families. The limits of the protein sequences included in the alignment are indicated by flanking residue positions. Alignments were produced with T-Coffee (Notredame *et al.*, 2000) using default parameters and slightly refined manually. The alignment was presented with the program Belvu using a colouring scheme indicating the average BLOSUM62 scores (which are correlated with amino acid conservation) of each alignment column: red (>3), violet (between 3 and 1.5) and light yellow (between 1.5 and 0.5) (Sonnhammer and Hollich, 2005). Sequences were obtained from UniProt, GenBank and JGI (Joint Genome Institute) databases, but were supplemented by manually assembled ESTs and FGENESH+ predicted gene models. The "mod" prefix identifies UniProt sequences corrected by gene prediction software FGENESH+ (Solovyev *et al.*, 2006). The "est" prefix identifies consensus sequences manually reconstructed by assembling highly similar NCBI-GenBank expressed sequence tags from identical species (conceptual translations). Sequences are named according to their UniProt identification or common name. Database of origin, accession numbers, and species name: UniProt:VASH1\_HUMAN, *Homo sapiens*; UniProt:VASH2\_HUMAN, *Homo sapiens*; SeaUrchin, UniProt:UPI0000E46146, *Strongylocentrotus purpuratus*; Branchiostoma, JGI genome FGENESH+ predicted gene and NCBI\_Est BW730620, *Branchiostoma floridae*; UniProt:V3ZRM9\_LOTGI, *Lottia gigantea*; Oyster, UniProt:UPI0005C3CA01, *Crassostrea gigas*; estAlvinella, NCBI\_Ests: GO188185 and GO140334, *Alvinella pompejana*; Capitella, JGI genome FGENESH+ predicted gene, *Capitella sp.*; UniProt:A7S7P4\_NEMVE, *Nematostella vectensis*; UniProt:B3RKK8\_TRIAD, *Trichoplax adhaerens*; UniProt:H2YLS2\_CIOSA, *Ciona savignyi*; UniProt:T1EI22\_HELRO, *Helobdella robusta*; UniProt:T1IQU1\_STRMM, *Strigamia maritima*; UniProt:F2UH18\_SALR5, *Salpingoeca rosetta*; estOpisthorchis, NCBI\_Est:ES417530, *Opisthorchis viverrini*; UniProt:A9JJD6\_SCHMA, *Schistosoma mansoni*; UniProt:U6HDZ6\_ECHMU, *Echinococcus multilocularis*; UniProt:T2MBD5\_HYDVU, *Hydra vulgaris*; UniProt:A9VAY5\_MONBE, *Monosiga brevicollis*; UniProt:E4X003\_OIKDI, *Oikopleura dioica*; UniProt:F0WGX1\_9STRA, *Albugo laibachii*; Phytophthora, JGI genome FGENESH+ predicted gene, *Phytophthora ramorum*; UniProt:K3X8V2\_PYTUL, *Pythium ultimum*; UniProt:Q4E4K0\_TRYCR, *Trypanosoma cruzi*; UniProt:Q387E4\_9TRYP, *Trypanosoma brucei brucei*; UniProt:Q4FYS6\_LEIMA, *Leishmania major*; UniProt:C1MY99\_MICPC, *Micromonas pusilla*; Volvox, JGI genome FGENESH+ predicted gene, *Volvox carteri*; Aureococcus, JGI genome FGENESH+ predicted gene, *Aureococcus anophagefferens*; Physcomitrella1, JGI genome FGENESH+ predicted gene, *Physcomitrella patens*; Selaginella1, JGI genome FGENESH+ predicted gene, *Selaginella moellendorffii*; Selaginella2, JGI genome FGENESH+ predicted gene, *Selaginella moellendorffii*; UniProt:D2VBG6\_NAEGR, *Naegleria gruberi*; UniProt:L1IQR7\_GUITH, *Guillardia theta*; MetaGenome5, NCBI\_gi:689677707, uncultured bacterium; UniProt:K2BS78\_9BACT, uncultured bacterium; UniProt:K2BDG4\_9BACT, uncultured bacterium; Acidobac, UniProt:UPI00036EC8CC, *Acidobacteriaceae bacterium*; bacUASB270, NCBI\_gi:672404298, *bacterium UASB270*; Karlodinium, NCBI\_Ests: EC161919 EC160142, *Karlodinium micrum*; MetaGenome3, NCBI\_gi:735013117, *archaeon GW2011\_AR4*; MetaGenome1, NCBI\_gi:735021449, *archaeon GW2011\_AR19*; MetaGenome7, NCBI\_gi:735018696, *archaeon GW2011\_AR17*; UniProt:Q02CZ5\_SOLUE, *Solibacter usitatus*; UniProt:M4VMI6\_9DELT, *Bdellovibrio exovorus*.

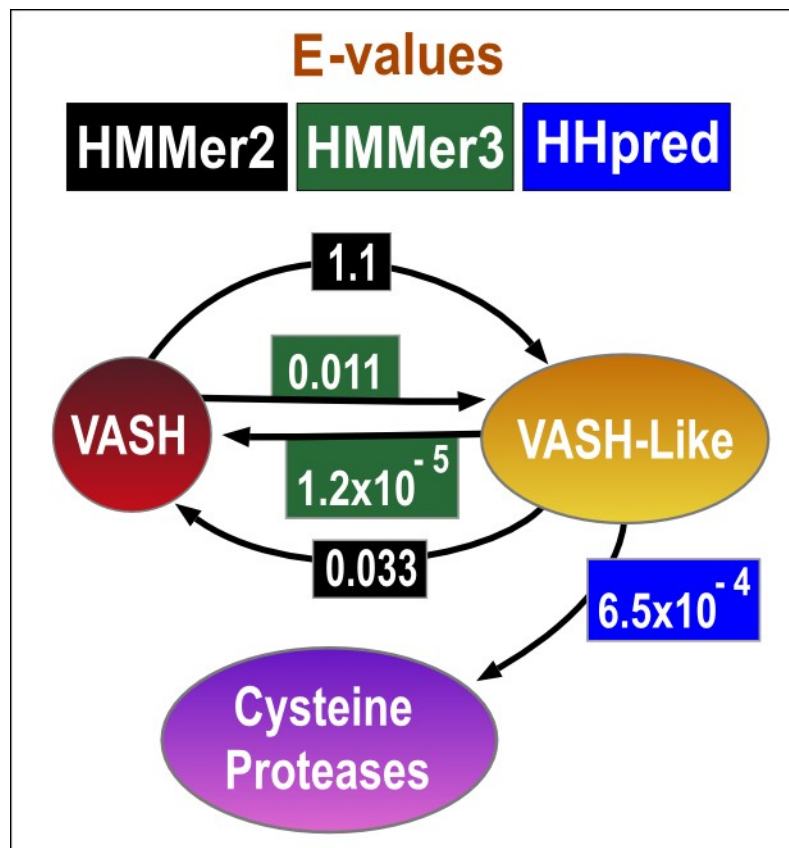

**Supplemental Fig. S2.**

**HMMer and HHpred comparison E-values.**

Numbers correspond to HMMer (versions 2 and 3) profile-versus-sequence (black and green boxes) and HHpred profile-versus-profile (blue box) comparison E-values from global profile search results (Eddy, 1996; Finn *et al.*, 2015; Soding *et al.*, 2005). Arrows indicate the profile search direction. Both versions of HMMer (used with default parameters) yielded highly concordant results. Profile-to-sequence (HMMer) and Profile-to-profile (HHpred) matches were evaluated in terms of an E-value, which is the expected number of non-homologous proteins with a score higher than that obtained for the database match. An E-value much lower than one indicates statistical significance.
